# Supplementary material for: The Impact of Social Health Insurance Quality on Intergenerational Medical Support for Older Adults
Source: Research Square preprint supplement (doi:10.21203/rs.3.rs-7600300/v1), 2025-10-23
Supplement: Supplementary file 1 [file fa1c6b65013fb1825618f6ce.docx]

Questionnaire on the high quality development of aging undertakings and industries

________ City ________ county/district ________ street/township ________ community/institution

Dear Madam/Sir,

Hello! We are the Social security research group of the School of Public Policy and Management of Xi 'an Jiaotong University. According to the research plan of the national major project "Research on Promoting High-quality Development of Aging Cause and Industry in China", we conduct a survey on relevant issues, hoping to know your opinions and views on high-quality development of aging cause and aging industry. The questionnaire will be filled out anonymously and will be kept strictly confidential. We promise to use it only for statistical and analytical purposes within the scope of the study. Please answer truthfully, thank you for your active participation and support!

Questionnaire number:

**I. Basic information**

| **Serial number** | **issue** | | | | | | **Options** | | | |
| --- | --- | --- | --- | --- | --- | --- | --- | --- | --- | --- |
| 1.0 | Your name is: | | | | | | ____________ | | | |
| 1.1 | Your age: | | | | | | ______ years old | | | |
| 1.2 | Your gender: | | | | | | （1）Male（2）Female | | | |
| 1.3 | Your education level: | | | | | | (1) Primary school and below (2) Junior High School (3) Senior high school/technical secondary School (4) Junior College (5) Bachelor degree or above | | | |
| 1.4 | Type of marriage: | | | | | | (1) Unmarried (2) married (3) divorced (4) widowed | | | |
| 1.5 | Domicile: | | | | | | (1) Urban and (2) rural areas | | | |
| 1.6 | Previous Jobs: | | | | | | (1) Civil servants (2) Employees in enterprises and public institutions (3) self-employed persons (4) farmers (5) migrant workers (6) others ______ | | | |
| 1.7 | Political status: | | | | | | (1) Party members (2) Democratic parties (3) the masses | | | |
| 1.8 | Senior Society Members: | | | | | | (1) Yes (2) No | | | |
| Participating in election activities (village head, NPC deputy) : | | | | | | (1) Yes (2) No | | | |
| 1.9 | What is your physical condition: | | | | | | (1) Very poor (2) relatively poor (3) Average (4) Relatively good (5) very good | | | |
| 1.10 | Which of the following activities do you have difficulty completing independently (multiple choices) : | | | | | | (1) Eating (2) Dressing (3) Getting in and out of bed (4) Going to the toilet (5) Walking indoors (6) Taking a bath (7) None | | | |
| 1.11 | If you are unable to take care of yourself, do you worry that no one will take care of you: | | | | | | (1) Very worried (2) relatively worried (3) generally (4) not worried (5) not worried | | | |
| 1.12 | The main symptoms that are currently bothering you (multiple choices) : | | | | | | (1) Serious diseases requiring hospitalization (2) chronic diseases (3) Mental diseases (4) common or frequently-occurring diseases (5) other ______ (6) none | | | |
| If you choose the first 5 items, please answer | Your type of disease (multiple choices) : | | | | | | (1) Cardiovascular and cerebrovascular diseases (coronary heart disease, cerebral infarction, hypertension) (2) Osteoarthropathy (3) Chronic bronchitis (4) Cataracts (5) chronic gastropathy (6) diabetes mellitus (7) Malignant tumors (8) Mental disorders (9) Hematologic diseases (10) other ______ | | | |
| How are your diseases changing now: | | | | | | (1) gets better (2) gets worse (3) is about the same as before | | | |
| Your type of disability (multiple choices) : | | | | | | (1) Visual disability (2) Hearing Disability (3) Speech disability (4) Physical disability (5) Intellectual disability (6) Mental disability (7) Other ________ (8) none | | | |
| 1.13 | Your memory thinking ability: | | | | | | (1) Very good (2) relatively good (3) Average (4) relatively poor (5) very poor | | | |
| 1.14 | Do you have a health record: | | | | | | (1) Yes (2) No | | | |
| 1.15 | Have you consciously managed your own health before: | | | | | | (1) Yes (2) No | | | |
| 1.16 | Have you had a physical examination in the past 1 year: | | | | | | (1) Yes (2) No | | | |
| 1.17 | How many times per week do you exercise on average: | | | | | | (1) 6 times or more (2) 3-5 times (3) 1-2 times (4) Less than 1 time (5) never exercise | | | |
| 1.18 | Your home health investment includes (multiple options) : | | | | | | (1) Exercise fitness (2) Physical examination (3) Purchase of nutrition health products (4) Purchase of health insurance (5) do not invest | | | |
| 1.19 | How much are you willing to spend each year on health management (medical check-ups, health literacy, health improvement, etc.) : | | | | | | (1) Less than 1000 yuan (2) 1000-5000 yuan (3) 5000-10000 yuan (4) more than 10000 yuan | | | |
| 1.20 | Your main source of income (Yuan/year) (multiple choices) :  The annual revenue in 2018 was ________ yuan | | | | | | (1) My annual retirement or pension _____ yuan  (2) The annual retirement or pension of his wife _____ yuan  (3) Annual child subsidy _____ yuan  (4) Annual social assistance (subsistence allowance, five guarantees) _____ yuan  (5) Annual income from continued work ______ yuan  (6) Annual property income (rent, stock, etc.) ___ yuan  (7) Annual old age subsidies ______ yuan  (8) Other ______ yuan | | | |
| 1.21 | Your main consumption expenditure (Yuan/year) (multiple choices) :  The total expenditure for 2018 is ________ yuan | | | | | | (1) Annual food expenditure: _______ yuan  (2) Annual clothing expenditure: _______ yuan  (3) Annual housing expenses (repairs, rent, property management, utilities, etc.): _______ yuan  (4) Annual travel expenses (tourism, car purchase, fuel, etc.): _______ yuan  (5) Annual communication expenses (telephone, internet): _______ yuan  (6) Annual gifting expenses for relatives and friends: _______ yuan  (7) Annual medical expenses: _______ yuan  (8) Annual nanny/housekeeping expenses: _______ yuan  (9) Annual subsidies for children: _______ yuan  (10) Annual payment to elderly care institutions: _______ yuan  (11) Other: _______ yuan | | | |
| 1.22 | Are you worried about having no money in the future: | | | | | | (1) Very worried (2) somewhat worried (3) generally (4) not worried (5) not worried at all | | | |
| 1.23 | How is your standard of living compared to others around you: | | | | | | (1) Very poor (2) relatively poor (3) Almost (4) relatively good (5) very good | | | |
| 1.24 | Your current residence: | | | | | | (1) Living alone (2) living with spouse (3) Living with family (children) (4) Nursing home (5) other _______ | | | |
| 1.25 | Your primary caregiver (multiple choices) : | | | | | | (1) myself (2) spouse (3) children and other relatives (4) Community service personnel (5) Nanny (6) agency service personnel (7) other ______ | | | |
| 1.26 | Your current retirement method: | | | | | | (1) Home Care family services (2) Home care community services (3) Institutional care Institution services (4) Other ______ | | | |
| If you choose 3, please answer | Your reasons for staying in a nursing home are (multiple choices) : | | | | | | (1) Different life style from children (2) inconvenient to take care of children (3) Unsatisfactory original living environment (4) Able to communicate with peers (5) do not want to be a drag on children (6) Able to get better care (7) disharmonious family relationship (8) other ______ | | | |
| Who will pay your monthly expenses in the nursing home (multiple options) : | | | | | | (1) oneself (2) spouse (3) children (4) other relatives (5) original employer (6) Government (7) other _____ | | | |
| What do you think of the fee standard of the elderly care institution: | | | | | | (1) Very low (2) relatively low (3) Generally (4) relatively high (5) very high | | | |
| How long does it take to drive/ride from your home to your nursing home: | | | | | | (1) <15 minutes (2) 15-30 minutes (3) 30-60 minutes (4) 1-2 hours (5) >2 hours | | | |
| How long have you lived in the nursing home: | | | | | | ______ month | | | |
| Does your family approve of your stay in a nursing home? | | | | | | (1) Strongly disapprove (2) disapprove (3) Generally (4) somewhat approve (5) strongly approve | | | |
| 1.27 | Your expected retirement style: | | | | | | (1) Home Care family services (2) Home care community services (3) Institutional care Institution services (4) Other ______ | | | |
| If you choose 3, please answer | Have you taken the initiative to know about pension institutions: | | | | | | (1) Yes (2) No | | | |
| What factors will you consider when choosing a nursing home? (multiple choices) : | | | | | | (1) Price (2) Quality of service (3) living environment (4) Convenience (5) Nature of organization | | | |
| If you choose institutional retirement, which price will you choose: | | | | | | (1) Less than 2,000 yuan (2) 2-3 thousand yuan (3) 3-4 thousand yuan (4) 4-5 thousand yuan (5) more than 5,000 yuan | | | |
| 1.28 | Do you agree with the statement that "care for the elderly is also their own business"? | | | | | | (1) Do not agree (2) do not agree (3) do not care (4) More agree (5) strongly agree | | | |
| 1.29 | Do you think the government should take some responsibility for the elderly care? | | | | | | (1) Not at all (2) Not at all (3) It doesn't matter (4) It should (5) it should | | | |
| 1.30 | What kind of living environment do you prefer: | | | | | | (1) Very quiet (2) Relatively quiet (3) Doesn't matter (4) More lively (5) Very lively | | | |
| 1.31 | Compared to when you were younger, you feel connected to the outside world: | | | | | | (1) Increase (2) decrease (3) No change | | | |
| 1.32 | Your household population:  Number of children:  Number of children living in the same neighborhood (same street) : | | | | | | ______ people  Number of sons: _____ Number of daughters: ______  Number of sons: _____ Number of daughters: ______ | | | |
| **1.33 Family members (subject to household registration, covering all children, family visits to record each visit time) :** | | | | | | | | | | |
| Family member | | Age | Gender | Edu | Occupation | Residential distance | | Monthly income | Frequency of family visits | Family support |
|  | |  |  |  |  |  | |  |  |  |
|  | |  |  |  |  |  | |  |  |  |
|  | |  |  |  |  |  | |  |  |  |
|  | |  |  |  |  |  | |  |  |  |
|  | |  |  |  |  |  | |  |  |  |

Note: Cultural reference 1.3; Occupational reference 1.6; The living distance is: ① live in the same street/village ③ in the same county/district ④ in the same city ⑤ in the same province ⑥ outside the province ⑦ abroad; The frequency of family visits is: ① weekly ② every two weeks ③ monthly ④ every six months ⑤ one year or more ⑥ No children; Family support is: ① economic support ② care support ③ housing support ④ Emotional support ⑤ other support ⑥ No support.

| 1.34 **Overall living situation judgment:** | |
| --- | --- |
| Are you satisfied with your current living situation: | (1) Very dissatisfied (2) somewhat dissatisfied (3) Generally (4) fairly satisfied (5) very satisfied |
| Do you feel that others around you (including relatives and friends) respect you: | (1) Very little respect (2) little respect (3) Generally (4) More respect (5) Very respect |
| Do you feel that others around you understand what you are thinking: | (1) Very little understanding (2) little understanding (3) General (4) relatively understanding (5) very understanding |
| Do you have a close relationship with your family: | (1) Very not tight (2) not tight (3) Generally (4) relatively tight (5) very tight |
| Do you and your family members often support each other (financial assistance, housework sharing) : | (1) Rarely support each other (2) Rarely support each other (3) Generally (4) Always support each other (5) often support each other |
| Do you and your family members often communicate with each other (activities together, chatting and visiting) : | (1) Little communication (2) little communication (3) Generally (4) There will be communication (5) frequent communication |
| Do you have a good relationship with your neighbors and friends (the elderly) : | (1) Very disharmonious (2) not harmonious (3) Generally (4) more harmonious (5) very harmonious |
| Do you often help each other with your neighbors and friends (elderly people)? | (1) Rarely help each other (2) Rarely help each other (3) Generally (4) Always help each other (5) often help each other |
| Do you often do activities and chat with your neighbors and friends (the elderly) : | (1) Little activity, chat (2) little activity, chat (3) generally (4) Sometimes activity, chat (5) often activity, chat |
| How is your relationship with community/institutional elderly care workers: | (1) Very bad (2) not good (3) Average (4) fairly good (5) very good |
| How often do you chat with community/institutional care providers: | (1) Rarely talk (2) Rarely talk (3) Generally (4) Chat (5) often talk |
| Do you feel free in your life now: | (1) Very not free (2) not very free (3) Generally (4) Relatively free (5) very free |
| Do you often feel lonely and bored: | (1) Always (2) often (3) Occasionally (4) Rarely (5) Never |
| How do you feel your state of mind: | (1) Very bad (2) not good (3) Average (4) fairly good (5) very good |
| Do you feel the habit of living in this community/institution: | (1) Very unaccustomed (2) not accustomed (3) Generally (4) more accustomed (5) very accustomed |

**II. Pension system**

| **Serial number** | **Issue** | | **Options** |
| --- | --- | --- | --- |
| 2.1 | Do you think it is necessary to establish a subsidy system for disability and dementia care for the elderly: | | (1) necessary (2) unnecessary (3) doesn't matter |
| 2.2 | How much do you think the disability care allowance should be at least $per month? | | (1) 200-400 yuan (2) 400-600 yuan (3) 600-800 yuan (4) 800-1000 yuan (5) more than 1000 yuan |
| 2.3 | (Please answer for those aged 70 and above) If disability and dementia occur in the future, are you willing to stop the Old age allowance and replace it with disability and dementia care allowance: | | (1) Yes (2) No |
| 2.4 | (Please answer for people under the age of 70) Are you willing to change the old age subsidy that has not yet been issued to disability and dementia care subsidy: | | (1) Yes (2) No |
| 2.5 | (Only child elderly please answer) Are you willing to change the only child subsidy to disability and dementia care subsidy: | | (1) Yes (2) No |
| 2.6 | Which of the following social pension schemes are you enrolled in: | | (1) Basic old-age insurance for enterprise employees (2) Old-age insurance for government agencies and institutions (3) Basic old-age insurance for urban and rural residents (new agricultural insurance and urban residence insurance) (4) No participation in any of them |
| Participate in employee pension insurance (2.6 Options 1 and 2) Please answer | Year you start receiving pension benefits: | | _________ year (please fill in four digits) |
| Average monthly salary in the last year of employment: | | ________ Yuan/month |
| Pension for the first year after formal retirement: | | ________ Yuan/month |
| How much pension did you receive last month: | | ________ Yuan/month |
| Whether your organization has established an enterprise annuity (occupational annuity) for employees: | | (1) Yes (2) No (3) Not clear |
| How you feel your standard of living will change after retirement: | | (1) A significant decrease (2) a slight decrease (3) no change (4) an increase (5) a significant increase |
| At this year's price level, how much do you think your monthly pension will need to ensure that your standard of living will not decline after retirement? | | ________ Yuan/month |
| To participate in the old-age insurance for urban and rural residents (2.6 Choice 3), please answer | Have you personally paid pension insurance: | | (1) Yes (2) No |
| If yes, the payment level is: | | (1) 100 yuan (2) 200 yuan (3) 300 yuan (4) 400 yuan (5) 500 yuan (6) 600 yuan (7) 800 yuan (8) 1000 yuan (9) Other ________ yuan |
| How much pension did you receive last month: | | ________ Yuan/month |
| Do you think the monthly pension received by the elderly is enough to live on? | | (1) Completely enough (2) basically enough (3) no obvious feeling (4) insufficient (5) completely insufficient |
| From the new rural insurance (urban resident insurance) to the current basic old-age insurance for urban and rural residents, how do you think the effect of this policy is: | | (1) The effect is very good, solving the actual problems of residents (2) better alleviating the pressure of old-age care, but it needs to be improved (3) the effect is average, the effect is not obvious (4) the effect is very poor |
| 2.7 | Do you participate in commercial pension insurance: | | (1) Have not participated (2) have not participated (3) are receiving commercial pension benefits |
| Choose 2 and 3 from the previous question, please answer | Who bought this insurance for you: | | (1) oneself (2) Employer (3) relatives (4) others |
| Your annual premium:  Payment period: | | _______ yuan (if the old person is not clear can not fill in)  _______ years (do not fill in if the old person is not clear) |
| Commercial pension benefits: | | _________ yuan per month, can receive ________ years;  Or receive _________ yuan in one lump sum  (If the old person is not clear, do not fill in) |
| 2.8 | Do you think the main sources of living for the elderly should be: | | (1) Child support (2) Pension or superannuation (3) Savings (4) Commercial pension insurance (5) Others |
| 2.9 | How much you have saved for your retirement: | | (1) No savings (2) 10,000 to 50,000 (3) 50,000 to 100,000 (4) 100,000 to 200,000 (5) more than 200,000 |
| 2.10 Your knowledge of pension insurance: | | | |
| Payment burden pressure: | | (1) Large (2) Relatively large (3) Average (4) Small (5) small (small without payment) | |
| Satisfaction of treatment level: | | (1) Not satisfied (2) not very satisfied (3) Generally (4) fairly satisfied (5) very satisfied | |
| Satisfaction degree of treatment fairness: | | (1) Not satisfied (2) not very satisfied (3) Generally (4) fairly satisfied (5) very satisfied | |
| 2.11 | Are you worried that you won't get treatment if you get sick: | | (1) Very worried (2) relatively worried (3) generally (4) not worried (5) not worried |
| 2.12 | You participate in the following types of medical insurance (can choose more than one) : | | 1. (1) Urban workers (2) Urban residents (3) New rural cooperation (4) Medical insurance for public institutions (5) Supplementary medical insurance for enterprises (6) Commercial medical insurance (purchased by a unit and purchased by an individual) (7) medical assistance (8) None |
| 8. Please answer the previous question | The main reasons you are not currently enrolled in any health insurance are (more than one can choose) : | | (1) Don't need (2) Can't afford insurance (3) don't know where to go (4) Don't trust health insurance agencies (5) don't have the right insurance program (6) never thought about it (7) other ______ |
| 2.13 | Where do you get your medical insurance: | | (1) the county/city (2) (if the household registration is not in the county/city) where the household registration is (3) other ____ |
| 2.14 | You paid health insurance premiums last year: | | ________ Yuan/year (fill in 0 without payment) |
| 2.15 | Who will pay your premium (multiple options) : | | (1) oneself (2) children (3) relatives (4) Government (5) units (including village collectives) (6) Loans (7) other ____ |
| 2.16 | Have you been to the hospital in the past two weeks: | | (1) Yes (2) No |
| If the previous question was 1, please answer | Your type of visit: | | (1) The total amount for outpatient service is _______ yuan, of which _______ yuan is paid at one's own expense  (2) The total amount of hospitalization is _______ yuan, of which _______ yuan is paid at one's own expense  (3) The total amount of medicine is _______ yuan, of which _______ yuan is paid at one's own expense |
| 2.17 | How many minutes does it take to get from your home to the nearest medical facility (the fastest way easily accessible, such as on foot or by transportation) : | | ________ minutes |
| 2.18 | For general diseases, what kind of medical institutions do your family usually go to for medical treatment? | | (1) Community clinic/clinic (2) Township/neighborhood health center (3) County (district) Hospital (4) Municipal secondary hospital (5) Municipal tertiary hospital (6) other ______ |
| 2.18 Select (1) (2), please answer | Factors that encourage you to choose a community clinic (more than one can choose) : | | (1) Close to home (2) Familiar with the doctor (3) Low cost (4) short queuing time (5) Assured treatment level (6) Good attitude (7) Others: |
| 2.18 Select (3) - (6), please answer | Factors that prevent you from choosing a community (multiple options) : | | (1) Bad service attitude (2) insecure diagnosis and treatment level (3) Incomplete drugs, trouble in purchasing drugs (4) Incomplete test items (5) Others: |
| 2.19 | If the government stipulates that common diseases must be treated in community health service centers first, the referral form of community health service centers must be presented to large hospitals. Do you agree with the above practices: | | (1) Strongly oppose (2) oppose (3) agree (4) strongly agree |
| 2.20 | Do you know about grading/Medical combination/two-way referral: | | (1) Never heard of it (2) Heard of it, not aware of it (3) Generally aware of it (4) Very aware of it |
| If you chose (2) (3) (4) from the previous question, please answer | How do you know the above mentioned content (multiple choices) : | | (1) Publicity of health institutions (2) publicity on the Internet, media, newspapers, etc. (3) Community publicity (4) introduction of neighbors and friends (5) Other: |
| 2.21 | Have you experienced any of the following medical services (multiple options available) : | | (1) Two-way referral (2) Family doctor team service (3) Community diagnosis and treatment (including experts dispatched by superiors) (4) none |
|  | 2.21 Select (1), please check the specific content of the two-way referral that you think is satisfactory, (multiple choices can be made) : | | (1) The up-transfer is prioritized; (2) the examination results are exchanged to avoid repeated examinations; (3) the medical insurance is exchanged and the starting line is not double-calculated; (4) the medical costs are reduced; (5) the referral process is smooth and convenient; (6) it is conducive to the timely treatment of diseases  (7) None |
| 2.21 Select (2), do you think the family doctor team service (can choose more) : | | (1) Helpful for disease recovery (2) Good service attitude of the family doctor team (3) ineffective (4) Other |
| 2.21 Select (3) and check the community diagnosis and treatment content that you think is satisfactory (multiple choices can be made) : | | (1) Good service attitude (2) High diagnosis and treatment level of experts dispatched by superiors (3) expected diagnosis and treatment effect (4) good service attitude of community medical staff (5) improved treatment environment (6) Commonly used drugs can be bought in the community (7) No |
| 2.22 | In the past year, have you not been hospitalized when your doctor said you should be? | | (1) Yes (2) No |
| If you chose (2) from the previous question, please answer | The main reasons why you are not hospitalized are: | | (1) No money (2) unwilling to stay in hospital (3) Hospital is useless, hospital medical conditions are poor (4) think the problem is serious, hospital is useless (5) there are no beds in the hospital (6) other ___ |
| 2.23 Your understanding of medical insurance: | | | |
| Payment burden pressure: | | (1) Large (2) Relatively large (3) Average (4) Small (5) Small (no fee option is small) | |
| Pressure on out-of-pocket medical expenses: | | (1) Very large (2) relatively large (3) Generally (4) small (5) very small | |
| Satisfaction degree of medical service: | | (1) Not satisfied (2) not very satisfied (3) Generally (4) fairly satisfied (5) very satisfied | |
| 2.24 | Are you a recipient of government assistance: | | (1) No (2) Yes (① subsistence allowance ② five guarantees ③ three nods ④ Poor households) |
| If the answer is 2, please answer | What kind of government assistance or welfare assistance have you received: | | (1) subsistence allowance (2) Five guarantees (3) Poverty relief Yuan/year (4) Medical assistance (5) Temporary assistance (6) Priority in nursing homes (7) Home help (8) Improvement of living conditions (9) Nursing and nursing services (10) Provision of rehabilitation AIDS and other aging products (11) Psychological counseling (12) Legal aid (13) other ____ |
| How you got help from the government: | | (1) Application by oneself (2) application by children (3) application by neighbors and friends (4) application by the community |
| What help do you need from the government: | | (1) subsistence allowances (2) Five guarantees (3) poverty relief (4) Medical assistance (5) Temporary assistance (6) Priority in nursing homes (7) Home help (8) Improvement of living conditions (9) Nursing and nursing services (10) Provision of elderly products such as rehabilitation AIDS (11) Psychological counseling (12) Legal aid (13) other ____ |
| Does the existing financial support provided by the government meet your retirement needs: | | (1) Fully satisfied (2) mostly satisfied (3) basically satisfied (4) hardly satisfied (5) completely unsatisfied |
| Do you think the in-kind support provided by the community/institution can meet your elderly care needs: | | (1) Fully satisfied (2) mostly satisfied (3) basically satisfied (4) hardly satisfied (5) completely unsatisfied |
| Projects that you want the government, community, and organization to further improve: | | (1) Increase the amount of relief and welfare (2) increase rehabilitation and care services (3) improve living conditions (4) Pay attention to the spiritual and cultural needs of the elderly |
| Which of the old age support programs you have received have helped you the most (choose three) : | | (1) subsistence allowance (2) medical assistance (3) rehabilitation and nursing services (4) Stay in an elderly care institution (5) Improve living conditions |
| How much do you think the Old Age benefits program has improved your life: | | (1) much improved (2) slightly improved (3) no change (4) worse |
| During the process of receiving old age support, were you satisfied with the relevant staff: | | (1) Very satisfied (2) somewhat satisfied (3) Generally (4) not very satisfied (5) very dissatisfied |
| 2.25 | If you need help in an emergency, can you find a helper: | | (1) Always found (2) Sometimes not found (3) Rarely found (4) Never found |
| 2.26 | When you encounter financial difficulties, can you find a helper: | | (1) Always found (2) Sometimes not found (3) Rarely found (4) Never found |

**III. Demand and supply of elderly care services**

| **Serial number** | **Issue** | **Options** |
| --- | --- | --- |
| 3.1 | Do you know about this community/organization: | (1) Very little understanding (2) little understanding (3) Generally (4) more understanding (5) very understanding |
| 3.2 | Are you concerned about elderly care services in your community/institution: | (1) No concern (2) little concern (3) General (4) more concern (5) very concerned |
| 3.3 Life care services | Residential care facilities provided by community/institutions (multiple options) : | (1) Dining halls for the elderly (2) bathhouses for the elderly (3) Elderly care service centers/day care centers/Mutual assistance and happiness homes (4) Commercial elderly care service companies (5) Elderly care Information service centers/virtual elderly care systems (6) other _____ (7) none |
| (Community only) Is it convenient to get to the senior care Center from your home: | (1) Very inconvenient (2) inconvenient (3) Generally (4) relatively convenient (5) very convenient |
| (Community only) What are the benefits/benefits of the construction of the Community elderly care Service center for you: | (1) small (2) small (3) Average (4) large (5) large |
| (Community only) Do you feel that the Community Aged Care Center is playing a sufficient role: | (1) Very insufficient (2) insufficient (3) Generally (4) more sufficient (5) very sufficient |
| (Community only) How do you think the community elderly care Service center will develop in the future? | (1) Getting worse (2) getting slightly worse (3) It doesn't matter (4) getting slightly better (5) Getting better |
| (Community only) Would you like to eat in the Senior dining hall: | (1) Very reluctant (2) very reluctant (3) Generally (4) more willing (5) very willing |
| Life care services provided by community/institution (multiple choices, based on the collection list of community/Institution service items) : | (1) Assisted meal service (table for the elderly, home cooking, food delivery and catering) (2) Health service (cleaning, clothing cleaning, personal hygiene) (3) agency service (purchasing goods, agency payment) (4) Emergency assistance (emergency call, emergency assistance, emergency maintenance) (5) safety assurance (safety guidance, regular inspection visits, travel escorts) (6) Smart elderly care services (① ordering meals by telephone ② booking housekeeping ③ online shopping) (7) other ______ (8) none |
| You have used the life care services provided by the community/organization (multiple choices) : | (1) Assisted meal service (table for the elderly, home cooking, food delivery and catering) (2) Health service (cleaning, clothing cleaning, personal hygiene) (3) agency service (purchasing goods, agency payment) (4) Emergency assistance (emergency call, emergency assistance, emergency maintenance) (5) safety assurance (safety guidance, regular inspection visits, travel escorts) (6) Smart elderly care services (① ordering meals by telephone ② booking housekeeping ③ online shopping) (7) other ______ (8) none |
| What kind of life care services do you want the community/organization to provide? (multiple choices) : | (1) meal assistance services (table for the elderly, home cooking, meal delivery and catering) (2) health services (cleaning, clothing cleaning, personal hygiene) (3) agency services (purchasing goods, agency payment) (4) Emergency assistance (emergency call, emergency assistance, emergency maintenance) (5) safety assurance (safety guidance, regular inspection visits, travel escorting) (6) Smart elderly care services (① telephone meal booking ② housekeeping booking ③ online shopping) (7) Other ______ (8) none |
| Does the community/institution provide life care services to meet your daily needs: | (1) Completely unable (2) not very able (3) basically able (4) mostly able (5) completely able |
| How satisfied you are with the life care services provided by the community/institution: | (1) Very dissatisfied (2) somewhat dissatisfied (3) Generally (4) fairly satisfied (5) very satisfied |
| How much you spend on living care services each month: | ________ Yuan/month |
| Do you think the charge for life care service is reasonable: | (1) Very unreasonable (2) not reasonable (3) Average (4) relatively reasonable (5) very reasonable |
| Can you afford the cost of living care services: | (1) Completely unable (2) not very able (3) basically able (4) mostly able (5) completely able |
| 3.4  Medical care service | Medical care service facilities provided by community/institutions (multiple options) : | (1) Health room/clinic (2) Pharmacy (3) Nearby hospital/health center (4) Physiotherapy rehabilitation room (5) Other ___ (6) None |
| **(Community only) Is it easy to get from your home to the nearest clinic or health service centre:** | (1) Very inconvenient (2) not very convenient (3) Generally (4) relatively convenient (5) very convenient |
| **(Community only) Do you feel that community clinics/health service centres are performing an adequate role:** | (1) Very insufficient (2) insufficient (3) Generally (4) Relatively sufficient (5) very sufficient |
| What do you think community health service centers need to improve from the following aspects (multiple choices) : | (1) The diagnosis and treatment level of medical personnel (2) the medical equipment is complete and the examination is more comprehensive (3) the treatment environment  (4) Better service attitude (5) More variety of drugs provided (6) other ___ |
| Medical care services provided by the community/institution (multiple choices, based on the collection list of community/Institution service items) : | (1) Health management (health lectures, regular physical examination, disease prevention, health records, chronic disease maintenance) (2) Home diagnosis (home hospital beds, home visits) (3) community/institutional medical treatment (4) accompanying medical treatment (5) rehabilitation nursing (postoperative rehabilitation, nursing services, hospice care) (6) smart elderly care services (① health monitoring ②) Remote health consultation ③ Online family doctor) (7) Other (8) None |
| You have used the medical care services provided by the community/organization (multiple choices) : | (1) Health management (health lectures, regular physical examination, disease prevention, health records, chronic disease maintenance) (2) Home diagnosis (home hospital beds, home visits) (3) community/institutional medical treatment (4) accompanying medical treatment (5) rehabilitation nursing (postoperative rehabilitation, nursing services, hospice care) (6) smart elderly care services (① health monitoring ②) Remote health consultation ③ Online family doctor) (7) Other (8) None |
| What medical care services you would like your community/institution to provide (multiple choices) : | (1) Health management (health lectures, regular physical examination, disease prevention, health records, chronic disease maintenance) (2) Home diagnosis (home hospital beds, home visits) (3) community/institutional medical treatment (4) accompanying medical treatment (5) rehabilitation nursing (postoperative rehabilitation, nursing services, hospice care) (6) smart elderly care services (① health monitoring ②) Remote health consultation ③ Online family doctor) (7) Other (8) None |
| Is the medical care provided by the community/institution effective (multiple choices) : | (1) Completely ineffective (2) not very effective (3) Basically effective (4) Relatively effective (5) Very effective |
| Can you quickly and easily apply for and receive community/institutional medical care services: | (1) Completely unable (2) not very able (3) basically able (4) mostly able (5) completely able |
| Does the community/institution provide medical care to meet your health care needs: | (1) Completely unable (2) not very able (3) basically able (4) mostly able (5) completely able |
| Your satisfaction with the medical care provided by the community/institution: | (1) Very dissatisfied (2) somewhat dissatisfied (3) Generally (4) fairly satisfied (5) very satisfied |
| How much you spend on medical care services each month: | ________ Yuan/month |
| Do you think the charges for medical care services are reasonable? | (1) Very unreasonable (2) not reasonable (3) Average (4) relatively reasonable (5) very reasonable |
| Can you afford the cost of medical care services: | (1) Completely unable (2) not very able (3) basically able (4) mostly able (5) completely able |
| 3.5  Cultural and entertainment service | Cultural and recreational services provided by the community/organization (multiple options) : | (1) Activity center for the elderly (2) Chess and Card room (3) Reading Room (4) Painting room (5) Fitness room for the elderly (6) Other ____ (7) none |
| **(Community only) Is it easy to get from your home to the nearest place of recreation (activity center) :** | (1) Very inconvenient (2) not very convenient (3) Generally (4) relatively convenient (5) very convenient |
| Do you feel that community/institutional recreation facilities are being adequately used: | (1) Very insufficient (2) not sufficient (3) Generally (4) relatively sufficient (5) very sufficient |
| Cultural and entertainment services provided by the community/institution (multiple choices, based on the collection list of community/institution service items) : | (1) Interest groups for the elderly (2) Artistic performances (3) Chess and card activities (4) knowledge lectures (5) Intelligent entertainment services for the elderly (① online interest groups for the elderly, ② online classes for the elderly, ③ intelligent product experience) (6) others ______ (7) none |
| You have used the cultural and entertainment services provided by the community/organization (multiple choices) : | (1) Interest groups for the elderly (2) Artistic performances (3) Chess and card activities (4) knowledge lectures (5) Intelligent entertainment services for the elderly (① online interest groups for the elderly, ② online classes for the elderly, ③ intelligent product experience) (6) others ______ (7) none |
| What cultural and entertainment services you want your community/organization to provide (multiple choices) : | (1) Interest groups for the elderly (2) Artistic performances (3) Chess and card activities (4) knowledge lectures (5) Intelligent entertainment services for the elderly (① online interest groups for the elderly, ② online classes for the elderly, ③ intelligent product experience) (6) others ______ (7) none |
| Are there many interest organizations for the elderly (including the Elderly Association) in the community/institution: | (1) Rarely (2) rarely (3) Generally (4) more (5) a lot |
| Are there many recreational activities for the elderly conducted by the community/institutions: | (1) Rarely (2) rarely (3) Generally (4) more (5) a lot |
| Would you like to participate in these recreational activities: | (1) Reluctant (2) reluctant (3) indifferent (4) more willing (5) very willing |
| Do you participate in many of these recreational activities: | (1) Rarely (2) rarely (3) Generally (4) more (5) a lot |
| Can the cultural and recreational services provided by the community/institution meet your cultural and recreational needs: | (1) Completely unable (2) not very able (3) basically able (4) mostly able (5) completely able |
| Your satisfaction with the cultural and recreational services provided by the community/institution: | (1) Very dissatisfied (2) somewhat dissatisfied (3) Generally (4) fairly satisfied (5) very satisfied |
| How much you spend on cultural and entertainment services each month: | ________ Yuan/month (fill in 0 yuan without charge, choose 5 from the last two questions) |
| Do you think the charges for cultural and entertainment services are reasonable? | (1) Very unreasonable (2) not reasonable (3) Average (4) relatively reasonable (5) very reasonable |
| Can you afford the corresponding cultural and entertainment services: | (1) Completely unable (2) not very able (3) basically able (4) mostly able (5) completely able |
| 3.6  Spiritual comfort service | Spiritual comfort service facilities provided by community/organization: | (1) Psychological counseling room (2) Other ______ |
| Content of spiritual comfort services provided by the community/organization (multiple options, based on the collection list of community/organization service items) : | (1) Psychological counseling and counseling (2) accompanied chat (3) Reading newspapers (4) Regular door-to-door or telephone visits (5) marriage intermediary (6) other ______ (7) none |
| You have used the spiritual comfort services provided by the community/organization (multiple choices) : | (1) Psychological counseling and counseling (2) accompanied chat (3) Reading newspapers (4) Regular door-to-door or telephone visits (5) marriage intermediary (6) other ______ (7) none |
| What you would like your community/organization to provide (multiple choices) : | (1) Psychological counseling and counseling (2) accompanied chat (3) Reading newspapers (4) Regular door-to-door or telephone visits (5) marriage intermediary (6) other ______ (7) none |
| Are the psychological counseling and counseling services provided by the community/institution effective: | (1) Completely ineffective (2) not very effective (3) Basically effective (4) Relatively effective (5) Very effective |
| Can the community/organization provide comfort services to meet your comfort needs: | (1) Completely unable (2) not very able (3) basically able (4) mostly able (5) completely able |
| Your satisfaction with the spiritual comfort services provided by the community/organization: | (1) Very dissatisfied (2) somewhat dissatisfied (3) Generally (4) fairly satisfied (5) very satisfied |
| How much you spend on spiritual services: | ________ Yuan/month (no charge to fill in 0 yuan) |
| 3.7  Serve the elderly | Service facilities for the elderly provided by community/organizations (multiple options) : | (1) University for the Elderly (2) Re-employment services for the elderly (3) Tourism services for the elderly (4) Others (5) None |
| **(Community only) Is it easy to get from your home to the nearest senior university:** | (1) Very inconvenient (2) not very convenient (3) Generally (4) relatively convenient (5) very convenient |
| **(Community only) Would you like to study at the University for the Elderly:** | (1) Very reluctant (2) very reluctant (3) Generally (4) more willing (5) very willing |
| **(Community only) Can you financially afford to study at the University for the Elderly:** | (1) Completely unable (2) not very able (3) basically able (4) mostly able (5) completely able |
| Services for the elderly provided by the community/organization (multiple choices, based on the collection of community/organization service items) : | (1) Learning services for the elderly (2) Voluntary services for the elderly (3) Sports services for the elderly (4) re-employment services for the elderly (5) tourism services for the elderly (6) other ______ (7) none |
| You have used the community/organization to provide useful services for the elderly (multiple choices) : | (1) Learning services for the elderly (2) Voluntary services for the elderly (3) Sports services for the elderly (4) re-employment services for the elderly (5) tourism services for the elderly (6) other ______ (7) none |
| What services you want your community/organization to provide for the elderly (multiple choices) : | (1) Learning services for the elderly (2) Voluntary services for the elderly (3) Sports services for the elderly (4) re-employment services for the elderly (5) tourism services for the elderly (6) other ______ (7) none |
| Would you like to participate in some activities to help or serve the community or others: | (1) Reluctant (2) reluctant (3) indifferent (4) more willing (5) very willing |
| Do you participate in many activities to help or serve the community or others: | (1) Rarely (2) rarely (3) Generally (4) more (5) a lot |
| Do you find community/institutional tourism activities for the elderly reliable? | (1) Very unreliable (2) not very reliable (3) Average (4) relatively reliable (5) very reliable |
| Can the community/organization provide services to meet your needs for active aging: | (1) Completely unable (2) not very able (3) basically able (4) mostly able (5) completely able |
| How satisfied you are with the active services provided by your community/organization: | (1) Very dissatisfied (2) somewhat dissatisfied (3) Generally (4) fairly satisfied (5) very satisfied |
| How much you spend each month on services for the elderly: | ________ Yuan/month (no charge to fill in 0 yuan) |
| 3.8  Rights protection service | **(Only community) Rights and interests protection services provided by the community (multiple choices, based on the collection table of community service items) :** | (1) Legal publicity (2) Legal advice (3) Legal aid  (4) Coordination of rights protection (5) Others (6) None |
| **(Community only) You have used the rights protection services provided by the community (multiple choices) :** | (1) Legal publicity (2) Legal advice (3) Legal aid  (4) Coordination of rights protection (5) Others (6) None |
| **(Community only) Is it convenient to get to the nearest elder advocacy organization from your home:** | (1) Very inconvenient (2) not very convenient (3) Generally (4) relatively convenient (5) very convenient |
| **(Community only) Are you willing to accept the rights protection services of the community:** | (1) Very reluctant (2) very reluctant (3) Generally (4) more willing (5) very willing |
| **(Community only) Can you financially afford the elderly rights services provided by the community:** | (1) Completely unable (2) not very able (3) basically able (4) mostly able (5) completely able |
| **(Community only) Your satisfaction with the rights protection services provided by the community:** | (1) Very dissatisfied (2) somewhat dissatisfied (3) Generally (4) fairly satisfied (5) very satisfied |
| 3.9 | In general, do you think the elderly care services provided by the community/institution are adequate: | (1) Very incomplete (2) not complete (3) General (4) Relatively complete (5) Very complete |
| 3.10 | Do you think the elderly care services provided by the community/institution are standardized: | (1) Very non-standard (2) less standardized (3) Generally (4) relatively standardized (5) very standardized |
| 3.11 | Do you think the elderly care services provided by the community/institution are consistent with the promotion? | (1) Very inconsistent (2) very inconsistent (3) Generally (4) more consistent (5) very consistent |
| 3.12 | Can the elderly care services provided by the community/institution solve the various problems you are facing in your current life: | (1) Completely unable (2) not very able (3) basically able (4) mostly able (5) completely able |
| 3.13 | Can the elderly care services provided by the community/institution meet some of your individual needs: | (1) Completely unable (2) not very able (3) basically able (4) mostly able (5) completely able |
| 3.14 | **(Community only) Would you like to use the elderly care services provided by the community:** | (1) Reluctant (2) reluctant (3) indifferent (4) more willing (5) very willing |
| 3.15 | **(Community only) How often do you use the elderly care services provided by the community:** | (1) Never use (2) Never use (3) Occasionally use (4) Use (5) often use |
| 3.16 | **(Community only) Would you recommend to other senior citizens the services you have used:** | (1) Never (2) rarely (3) occasionally (4) recommended (5) often recommended |
| 3.17 | What do you value most about the elderly care services provided by the community/institution (multiple choices) : | (1) Quality of service (2) Cost of service (3) Type of service (4) Mode of service (5) other ______ |
| 3.18 | For the existing community/institutional elderly care services, you would like to improve the aspects (multiple choices) : | (1) Improve the quality of service personnel (2) improve the basic hardware facilities (3) Provide policy and legal advice (4) Increase the types of services (5) extend the nursing time (6) other ______ |
| 3.19 | Your overall satisfaction with the elderly care services provided by the community/institution: | (1) Very dissatisfied (2) somewhat dissatisfied (3) Generally (4) fairly satisfied (5) very satisfied |

**IV. Evaluation of elderly care service**

| **Serial number** | **Issue** | | **Options** |
| --- | --- | --- | --- |
| 4.1 | How often do communities/institutions publicize policies and regulations related to elderly care services to the elderly: | | (1) Never advertise (2) Never advertise (3) Occasionally advertise (4) Advertise (5) often advertise |
| 4.2 | Implementation effect of relevant elderly care service policies and regulations by communities/institutions: | | (1) Very poor (2) poor (3) Average (4) good (5) Very good (6) unclear |
| 4.3  Service subject situation | **(Community only) Volunteer teams established in the community to serve the elderly:** | | (1) No (2) less (3) generally (4) more (5) a lot (6) unclear |
| Do voluntary organizations outside the community/institution often come to provide services for the elderly: | | (1) Never (2) rarely (3) occasionally (4) quite a few (5) often (6) unclear |
| Are you satisfied with the volunteer service: | | (1) Very dissatisfied (2) somewhat dissatisfied (3) Generally (4) somewhat satisfied (5) Very satisfied (6) None |
| The community/organization often jointly organizes service activities for the elderly with outside enterprises and institutions: | | (1) Never (2) rarely (3) occasionally (4) quite a few (5) often (6) unclear |
| Would you like a social organization or business to enter the community/institution to provide services for you: | | (1) Very reluctant (2) very reluctant (3) Generally (4) more willing (5) very willing |
| **(Community only) For social organizations or enterprises to participate in community elderly care services, your main concern (multiple choices) :** | | (1) cannot afford the service fee (2) personal property safety cannot be guaranteed (3) the quality level of service personnel is not adequate (4) Service supervision is not in place (5) other _____ |
| Higher level government support for the development of elderly care services in the community/institution: | | (1) small (2) small (3) Average (4) large (5) large (6) unclear |
| Do you think the government attaches great importance to the elderly care? | | (1) Very little attention (2) little attention (3) Generally (4) more attention (5) very much |
| 4.4  Service process situation | How often does the community/organization ask for your opinions and ideas on issues related to elderly care services: | | (1) Never (2) rarely (3) occasionally (4) quite a few (5) often |
| Do communities/organizations often consider the views and needs of the elderly when planning and designing the provision of elderly care services: | | (1) Never (2) rarely (3) occasionally (4) quite a few (5) often |
| 4.5  Service facility  condition | In your opinion, the living environment of the community/institution: | | (1) Very bad (2) not good (3) Average (4) fairly good (5) very good |
| Community/Institutional Elderly Care Service Facilities: | | (1) Very incomplete (2) not complete (3) General (4) Relatively complete (5) Very complete |
| Community/Institutional Elderly Care Service Information Platform: | | (1) Very imperfect (2) not perfect (3) General (4) Relatively perfect (5) very perfect |
| Number of beds in Community/Institutional Aged Care: | | (1) Not enough (2) Not enough (3) barely enough (4) more than enough (5) very enough |
| Community/Institution Senior Activities Area: | | (1) Very small (2) relatively small (3) Average (4) relatively abundant (5) Very abundant |
| You feel to request services from the community/organization via phone, Internet, etc. : | | (1) Very inconvenient (2) inconvenient (3) General (4) relatively convenient (5) Very convenient (6) Never used |
| Waiting time for elderly care services provided by the community/institution: | | (1) Very long (2) relatively long (3) Generally (4) relatively fast (5) very fast |
| 4.6  Service personnel  condition | Personnel allocation | Number of community/institutional elderly care service personnel: | (1) Very insufficient (2) Not enough (3) Generally (4) relatively sufficient (5) very sufficient |
| Communities/institutions often train elderly care providers to: | (1) Never (2) rarely (3) occasionally (4) quite a few (5) often |
| Professional level | Can elderly care service workers keep their clothes dignified and clean: | (1) Not at all (2) not (3) Average (4) but also (5) very good |
| Do you think the service level of elderly care service personnel: | (1) Very poor (2) poor (3) Average (4) good (5) very good |
| friendliness | Are the elderly care service staff polite to you: | (1) Very impolite (2) Not very polite (3) Average (4) More polite (5) Very polite |
| Do you trust elderly care workers: | (1) Very difficult to trust (2) Very little trust (3) Generally (4) somewhat trust (5) Very trust |
| **(Community only) Do you feel assured that the elderly care service staff will come to your home to serve you:** | (1) Very not assured (2) not very assured (3) Generally (4) more assured (5) very assured |
| Concrete behavior | **(only institutions) Elderly care service staff can clean clothes, sheets, covers, etc. :** | (1) Completely unable (2) unable (3) basically able (4) mostly able (5) completely able |
| **Can the elderly care staff keep the room clean and tidy:** | (1) Completely unable (2) not very able (3) basically able (4) mostly able (5) completely able |
| **(Institution only) Can the elderly care service staff help you eat on time when needed:** | (1) Completely unable (2) not very able (3) basically able (4) mostly able (5) completely able |
| Degree of care | Can the elderly care service staff take the initiative to understand your difficulties and needs: | (1) Completely unable (2) not very able (3) basically able (4) mostly able (5) completely able |
| Elderly care service staff can give you special attention: | (1) Completely unable (2) not very able (3) basically able (4) mostly able (5) completely able |
| Will the care provider be concerned about your rights: | (1) Never (2) rarely (3) rarely (4) often (5) always |
| Response speed | Can the elderly care service staff serve you on time every time: | (1) Very not on time (2) not on time (3) Generally (4) more on time (5) Very on time |
| Can the service staff guarantee a timely response to your request no matter how busy: | (1) Completely unable (2) not very able (3) basically able (4) mostly able (5) completely able |
| Can the service staff handle your request: | (1) Completely unable (2) not very able (3) basically able (4) mostly able (5) completely able |
| 4.7  Service supervision | Do elderly care providers often make mistakes when serving you: | | (1) Rarely (2) rarely (3) Generally (4) often (5) always |
| If there is a mistake, can the elderly care service staff handle it properly: | | (1) Completely unable (2) not very able (3) basically able (4) mostly able (5) completely able |
| 社区/机构对养老服务的过程监督如何： | | (1) Very not strict (2) not strict (3) Generally (4) more strict (5) very strict |
| Will the community/agency explain the problems and comments found by the monitoring and improve the service: | | (1) Never (2) rarely (3) rarely (4) often (5) always |
| 4.8  Fairness perception | Do you think the pension services you receive reflect your pre-retirement contributions to society? | | (1) Completely unable (2) not very able (3) basically able (4) mostly able (5) completely able |
| Do you have equal access to a variety of senior care services compared to other seniors in your community/institution: | | (1) Completely unable (2) not very able (3) basically able (4) mostly able (5) completely able |
| Can the elderly care service process of the community/institution be strictly open, transparent, and not vary from person to person? | | (1) Very not strict (2) not strict (3) Generally (4) more strict (5) very strict |
| Do you think giving special temporary relief to needy elderly people is conducive to promoting equity: | | (1) Completely unable (2) not very able (3) basically able (4) mostly able (5) completely able |
| The community/agency will serve you strictly based on accurate information and relevant systems: | | (1) Very not strict (2) not strict (3) Generally (4) more strict (5) very strict |

**V.** **Aging product evaluation**

| **Serial number** | **Issue** | **Options** |
| --- | --- | --- |
| 5.1 | The following products, you feel the need is (can choose more) : | (1) Food products (2) Clothing products (3) Housing (4) transportation tools (5) Economic and financial products (6) assisted living appliances (7) Medical and rehabilitation products (8) Tourism products (9) cultural products for the elderly (10) health products (11) None |
| 5.2 | You have used the following products (answer questions 5.3-5.12 according to the selected category, if the category is not selected, skip the corresponding item) | (1) Food products (2) Clothing products (3) Housing (4) transportation tools (5) Economic and financial products (6) assisted living appliances (7) Medical and rehabilitation products (8) tourism products (9) cultural products for the elderly (10) health care products |
| 5.3 **Diet product** | | |
| Your usual diet is (optional) : | | (1) Cooking by oneself (2) Cooking by others (3) Delivery platform (4) Community senior dining tables/institutions provided (5) other ______ |
| Do you think the price of food is reasonable? | | (1) Reasonable (2) unreasonable (3) Don't spend money on yourself |
| Are you satisfied that food products are served on time (whether you can eat on time by cooking yourself) : | | (1) Very dissatisfied (2) Dissatisfied (3) Generally (4) satisfied (5) very satisfied |
| Are you satisfied with the nutritional and health status of your diet products? | | (1) Very dissatisfied (2) Dissatisfied (3) Generally (4) satisfied (5) very satisfied |
| Are you satisfied with the attitude of the staff who provide food and beverage products: | | (1) Very dissatisfied (2) Dissatisfied (3) Generally (4) satisfied (5) very satisfied |
| Do you think the diet products are suitable for the elderly: | | (1) Very dissatisfied (2) Dissatisfied (3) Generally (4) satisfied (5) very satisfied |
| Are you satisfied with the color and smell of the food: | | (1) Very dissatisfied (2) Dissatisfied (3) Generally (4) satisfied (5) very satisfied |
| 5.4 **Clothing product** | | |
| How your clothes are usually purchased (multiple options available) : | | (1) Purchase by oneself (2) Gift from children (3) Gift from others (4) community/organization (5) other ______ |
| Do you think the price of buying clothes is reasonable? | | (1) Reasonable (2) unreasonable (3) Don't spend money on yourself |
| Is it convenient for you to buy clothes: | | (1) Very dissatisfied (2) Dissatisfied (3) Generally (4) satisfied (5) very satisfied |
| Are you satisfied with the quality of clothing products: | | (1) Very dissatisfied (2) Dissatisfied (3) Generally (4) satisfied (5) very satisfied |
| Are you satisfied with the attitude of the clothing provider: | | (1) Very dissatisfied (2) Dissatisfied (3) Generally (4) satisfied (5) very satisfied |
| Do you think the current clothes are suitable for the elderly (comfortable, soft) : | | (1) Very dissatisfied (2) Dissatisfied (3) Generally (4) satisfied (5) very satisfied |
| Are you satisfied with the style and texture of the clothes? | | (1) Very dissatisfied (2) Dissatisfied (3) Generally (4) satisfied (5) very satisfied |
| 5.5 **Real estate residence** | | |
| How did you get your current home (single choice) : | | (1) Purchase by oneself (2) Purchase by children (3) Lease (4) Community/agency supply (5) other ______ |
| Do you think the housing price is reasonable? | | (1) Reasonable (2) unreasonable (3) Don't spend money on yourself |
| Do you think it is convenient for you to purchase/rent a house? | | (1) Very dissatisfied (2) Dissatisfied (3) Generally (4) satisfied (5) very satisfied |
| Are you satisfied with the quality of the house (water leakage, sound insulation) : | | (1) Very dissatisfied (2) Dissatisfied (3) Generally (4) satisfied (5) very satisfied |
| Are you satisfied with the attitude of property management staff in the community? | | (1) Very dissatisfied (2) Dissatisfied (3) Generally (4) satisfied (5) very satisfied |
| Are you satisfied with the accommodation for the elderly (elevators, barrier-free facilities) : | | (1) Very dissatisfied (2) Dissatisfied (3) Generally (4) satisfied (5) very satisfied |
| Are you satisfied with the environment of the residential area: | | (1) Very dissatisfied (2) Dissatisfied (3) Generally (4) satisfied (5) very satisfied |
| 5.6 **Mobility tools (wheelchairs, crutches, electric vehicles for the elderly)** | | |
| How did you get your transport? (multiple options) : | | (1) Purchase (2) Lease (3) Community/institutional offering (4) other ______ |
| Do you think the price of transportation is reasonable? | | (1) Reasonable (2) unreasonable (3) Don't spend money on yourself |
| Is it convenient for you to buy/rent a transportation vehicle: | | (1) Very dissatisfied (2) Dissatisfied (3) Generally (4) satisfied (5) very satisfied |
| Whether the transportation tool you are using is durable: | | (1) Very dissatisfied (2) Dissatisfied (3) Generally (4) satisfied (5) very satisfied |
| Are you satisfied with the attitude of the people who sell and repair transportation tools: | | (1) Very dissatisfied (2) Dissatisfied (3) Generally (4) satisfied (5) very satisfied |
| Do you think the transportation tools purchased are customized according to your personal situation: | | (1) Very dissatisfied (2) Dissatisfied (3) Generally (4) satisfied (5) very satisfied |
| Are you satisfied with the performance and operation of the transportation tool: | | (1) Very dissatisfied (2) Dissatisfied (3) Generally (4) satisfied (5) very satisfied |
| 5.7 **Economic financial management (money fund products, life insurance products, bank financial management products)** | | |
| How to buy your financial products (multiple options) : | | (1) Purchase by oneself (2) Purchase with the help of children (3) Purchase recommended by others (4) community/organization provided (5) other ______ |
| Whether the risks of financial products can be borne: | | (1) Yes (2) No |
| Is it convenient for you to buy financial products: | | (1) Very dissatisfied (2) Dissatisfied (3) Generally (4) satisfied (5) very satisfied |
| Are you satisfied with the return of financial products? | | (1) Very dissatisfied (2) Dissatisfied (3) Generally (4) satisfied (5) very satisfied |
| Are you satisfied with the attitude of financial product service personnel: | | (1) Very dissatisfied (2) Dissatisfied (3) Generally (4) satisfied (5) very satisfied |
| Do you think it is convenient for the elderly in financial management: | | (1) Very dissatisfied (2) Dissatisfied (3) Generally (4) satisfied (5) very satisfied |
| Do you think the wealth management products have fully utilized your spare funds? | | (1) Very dissatisfied (2) Dissatisfied (3) Generally (4) satisfied (5) very satisfied |
| 5.8 **Assistive living appliances (" age-appropriate "bathroom products, household appliances, kitchenware, etc.)** | | |
| What kind of auxiliary equipment do you usually use (can choose more) : | | (1) Dentures (2) Old sanitary products (3) Old electric appliances (4) old kitchen utensils (4) Hearing AIDS (5) reading glasses (6) other _____ |
| How did you get your assistive device (optional) : | | (1) Purchase (2) Lease (3) Community/institutional offering (4) other ______ |
| Do you think the price of assistive devices is reasonable? | | (1) Reasonable (2) unreasonable (3) Don't spend money on yourself |
| Is it easy for you to get assistive devices: | | (1) Very dissatisfied (2) Dissatisfied (3) Generally (4) satisfied (5) very satisfied |
| Is the assistive device you are using durable: | | (1) Very dissatisfied (2) Dissatisfied (3) Generally (4) satisfied (5) very satisfied |
| Are you satisfied with the attitude of the assistive equipment provider: | | (1) Very dissatisfied (2) Dissatisfied (3) Generally (4) satisfied (5) very satisfied |
| Do you think the assistive devices have been customized for your situation: | | (1) Very dissatisfied (2) Dissatisfied (3) Generally (4) satisfied (5) very satisfied |
| Do you feel that assistive devices have solved your difficulties: | | (1) Very dissatisfied (2) Dissatisfied (3) Generally (4) satisfied (5) very satisfied |
| 5.9 **Medical rehabilitation products (massage chairs, electronic thermometers, home ventilators)** | | |
| How did you get your medical rehabilitation products (multiple options) : | | (1) Purchase (2) Lease (3) Community/institutional offering (4) other ______ |
| Whether the price of such products is reasonable: | | (1) Reasonable (2) unreasonable (3) Don't spend money on yourself |
| Is it convenient for you to purchase medical rehabilitation products: | | (1) Very dissatisfied (2) Dissatisfied (3) Generally (4) satisfied (5) very satisfied |
| Are you satisfied with the operation and use effect of medical rehabilitation products? | | (1) Very dissatisfied (2) Dissatisfied (3) Generally (4) satisfied (5) very satisfied |
| Are you satisfied with the level of expertise of the personnel who provide medical rehabilitation products: | | (1) Very dissatisfied (2) Dissatisfied (3) Generally (4) satisfied (5) very satisfied |
| Do you think the current medical rehabilitation products are suitable for your personal situation? | | (1) Very dissatisfied (2) Dissatisfied (3) Generally (4) satisfied (5) very satisfied |
| Do you think medical rehabilitation products have improved your health: | | (1) Very dissatisfied (2) Dissatisfied (3) Generally (4) satisfied (5) very satisfied |
| 5.10 **Tourism product** | | |
| Who is the main contributor to your travel expenses (multiple options) : | | (1) Pay by yourself (2) Children help themselves (3) Purchase other products as gifts (4) community/organization provided (5) other ______ |
| Whether the price of such products is reasonable: | | (1) Reasonable (2) unreasonable (3) Don't spend money on yourself |
| Do you find it convenient to get travel products (get tour package information regularly) : | | (1) Very dissatisfied (2) Dissatisfied (3) Generally (4) satisfied (5) very satisfied |
| Are there any cases of cheating or forced shopping during your trip: | | (1) Very dissatisfied (2) Dissatisfied (3) Generally (4) satisfied (5) very satisfied |
| How much trust do you have in the people who provide the travel products: | | (1) Very dissatisfied (2) Dissatisfied (3) Generally (4) satisfied (5) very satisfied |
| Do you think the travel arrangements adequately cater for the needs of the elderly: | | (1) Very dissatisfied (2) Dissatisfied (3) Generally (4) satisfied (5) very satisfied |
| Are you satisfied with the itinerary of the tour? | | (1) Very dissatisfied (2) Dissatisfied (3) Generally (4) satisfied (5) very satisfied |
| 5.11 **Cultural products (sports equipment, dance supplies, painting and calligraphy supplies, Musical Instruments, books)** | | |
| How do you acquire cultural products (multiple choices) : | | (1) Purchase (2) Lease (3) Community/institutional offering (4) other ______ |
| Do you think the price of cultural products is reasonable? | | (1) Reasonable (2) unreasonable (3) Don't spend money on yourself |
| Whether it is convenient for you to purchase cultural products (nearby and timely) : | | (1) Very dissatisfied (2) Dissatisfied (3) Generally (4) satisfied (5) very satisfied |
| Do you think there is any content in cultural products that you find offensive? | | (1) Very dissatisfied (2) Dissatisfied (3) Generally (4) satisfied (5) very satisfied |
| Are you satisfied with the attitude of the people who provide cultural products: | | (1) Very dissatisfied (2) Dissatisfied (3) Generally (4) satisfied (5) very satisfied |
| Do you think the contents of cultural products are needed by the elderly? | | (1) Very dissatisfied (2) Dissatisfied (3) Generally (4) satisfied (5) very satisfied |
| Have the cultural products you have acquired enriched your life: | | (1) Very dissatisfied (2) Dissatisfied (3) Generally (4) satisfied (5) very satisfied |
| 5.12 **Health care products** | | |
| How do you get health care products (multiple options) : | | (1) Purchase (2) Lease (3) Community/institutional offering (4) other ______ |
| Have you ever encountered a health care scam: | | (1) Yes (2) No |
| Do you think the price of health care products is reasonable? | | (1) Reasonable (2) unreasonable (3) Don't spend money on yourself |
| Whether it is convenient for you to buy health care products (nearby and timely) : | | (1) Very dissatisfied (2) Dissatisfied (3) Generally (4) satisfied (5) very satisfied |
| Do you think there is widespread counterfeiting in health care products? | | (1) Very dissatisfied (2) Dissatisfied (3) Generally (4) satisfied (5) very satisfied |
| Are you satisfied with the attitude of the people selling health care products: | | (1) Very dissatisfied (2) Dissatisfied (3) Generally (4) satisfied (5) very satisfied |
| Do you think health care products are suitable for the elderly? | | (1) Very dissatisfied (2) Dissatisfied (3) Generally (4) satisfied (5) very satisfied |
| Are the health products you are using promoting your health? | | (1) Very dissatisfied (2) Dissatisfied (3) Generally (4) satisfied (5) very satisfied |
| 5.13 | Will you use the following smart products (multiple options) : | (1) Smartphones (2) tablets (3) computers (4) one-click pagers (5) do not |
| 5.14 | Your level of proficiency with smartphones: | (1) Very unskilled (2) not very skilled (3) Average (4) relatively skilled (5) very skilled |
| 5.15 | Are you willing to spend time and energy or even some money to learn how to use smart products: | (1) Very dissatisfied (2) Dissatisfied (3) Generally (4) satisfied (5) very satisfied |
| 5.16 | The following smart pension products you think you need are (multiple choices) : | (1) Health bracelet (2) Portable blood pressure monitor (3) Community self-help physical examination (4) Intelligent monitoring (5) Smart speaker (6) None |
| 5.17 | What kind of smart pension products have you purchased/leased (multiple choices) : | (1) Health bracelet (2) Portable blood pressure monitor (3) Community self-help physical examination (4) Intelligent monitoring (5) Smart speaker (6) None |
| If questions 5.17 are 1-5, please answer | The reasons why you choose to buy/lease Smart Care products are (multiple choices) : | (1) Smart products are easy to operate and use (2) can improve the efficiency of life (3) can increase the enjoyment of life (4) the quality of smart products is better (5) the science and technology experience is better (6) other ______ |
| Your purchase method (multiple options) : | (1) Purchase (2) Lease (3) Community/institutional offer |
| What do you think is a more reasonable way to buy: | (1) Purchase (2) Lease (3) Community/institutional offer |
| Your annual spending on this type of product:  In the case of leasing, the monthly rent is: | __________ yuan  __________ yuan |
| Do you think the price of smart pension products is reasonable? | (1) Reasonable (2) unreasonable (3) Don't spend money on yourself |
| Is it convenient for you to purchase smart pension products (nearby and timely) : | (1) Very dissatisfied (2) Dissatisfied (3) Generally (4) satisfied (5) very satisfied |
| Do you think the smart pension products are durable? | (1) Very dissatisfied (2) Dissatisfied (3) Generally (4) satisfied (5) very satisfied |
| Do you think the sales staff of smart pension products have introduced the functions and use of the products clearly: | (1) Very dissatisfied (2) Dissatisfied (3) Generally (4) satisfied (5) very satisfied |
| Do you think the smart pension products are convenient for the elderly to use and operate: | (1) Very dissatisfied (2) Dissatisfied (3) Generally (4) satisfied (5) very satisfied |
| Do you think smart pension products really facilitate your life? | (1) Very dissatisfied (2) Dissatisfied (3) Generally (4) satisfied (5) very satisfied |
| If you choose 6 from question 5.17, please answer | The reasons why you are not willing to buy/lease smart pension products are (multiple choices can be made) : | (1) insecure about the quality (2) easy to disclose privacy (3) inconvenient operation (4) high price (5) psychological unacceptable (6) no channels to buy/rent (7) do not know this product (8) other ______ |
| 5.18 | Do you know about the "smart elderly care" service: | (1) Very not understand (2) do not understand (3) generally (4) more understand (5) very understand |
| If you choose 1 and 2 of 5.18, please answer | Based on your understanding (or after listening to our introduction), whether you are willing to use the "smart elderly care" service: | (1) Yes (2) No, please explain the reason _______ |
| If yes, please select the smart elderly care service you most want to use: | (1) Home chronic disease management (example: Health information management)  (2) Home health care (example: online appointment nurse on-site service)  (3) Home personalized health management (example: health screening tests and services)  (4) Internet health consultation (example: online medical service)  (5) Intelligent daily care services (example: Community elderly care process supervision)  (6) Community information service (example: information management system) |
| If questions 5.18 are 3-5, please answer | How did you learn about the "smart elderly care" service? (multiple choices) | (1) Traditional media (newspapers, TV, radio, etc.) (2) new media (Weibo, wechat, Douyin, Kuaishou, etc.) (3) friends and relatives chat  (4) Community/township staff propaganda (5) "smart pension" company staff door-to-door promotion/telemarketing (6) other ________ |
| 5.19 | Have you used the "Smart Aged Care" service: | (1) Used (2) Not used |
| If the answer to question 5.19 is 1, please answer | Is it difficult for you to use the "smart elderly care" service: | (1) Very difficult (2) Relatively difficult (3) average  (5) It is not difficult |
| Have you used the "Smart Aged Care" service to listen to the opinions of others? (multiple options are available) | (1) No, I decided by myself (2) strongly suggested by my children (3) recommended by relatives and friends (4) Village cadres/community publicity (5) door-to-door/telephone introduction by relevant staff |
| Do you think it is worth spending money on "smart aged care" services: | (1) Not worth it (2) Not worth it (3) Not worth it  (5) It is well worth it |
| Would you like to recommend the "smart Aged Care" service you use to your relatives and friends: | (1) Very reluctant (2) reluctant (3) in general  (5) I'd like to |
| Do you think the "smart Aged Care" service has improved your quality of life: | (1) No improvement at all (2) no improvement at all (3) a little improvement (4) a significant improvement (5) a significant improvement |
| Are you satisfied with the "smart elderly care" service you have used at present: | (1) Very dissatisfied (2) Dissatisfied (3) Generally (4) satisfied (5) very satisfied |

**Thank you, I wish you good health!**

Investigator: ________ Recorder: ________ Survey time: __________
